# Supplementary material for: Associations of Glycemic Control With Cardiovascular Outcomes Among US Hemodialysis Patients With Diabetes Mellitus
Source: PubMed Central journal article supplement (PMC5669174; doi:10.1161/jaha.117.005581), 2017-06-07
Supplement: JAH3-6-e005581-s001.pdf [file JAH3-6-e005581-s001.pdf]

# **SUPPLEMENTAL MATERIAL**

**Table S1.** One-at-a-time sensitivity analysis examining the extent to which each covariate has an influence on the final model for each outcome of interest

In this analysis, we removed the covariates one at a time from the full model and computed  $\Delta$  as shown below to determine whether the variable was a significant confounder according to the 10% rule. The tables hereby present beta estimates and 95% CI across HbA1c categories for the full model as well as beta estimates and % change in these estimates for the reduced model after each covariate was removed one-by-one from the full model. We present data for all outcomes of interest.

$$\text{Full model: } \log H = \beta_{11}(\text{HbA1c2}) + \beta_{21}(\text{HbA1c3}) + \beta_{31}(\text{HbA1c4}) + \gamma_1 Z + \delta_1 X$$

$$\text{Reduced model: } \log H + \beta_{10}(\text{HbA1c2}) + \beta_{20}(\text{HbA1c3}) + \beta_{30}(\text{HbA1c4}) + \gamma_0 Z,$$

where covariate X was removed from the full model

$$\text{Compute } \Delta = \frac{\beta_{10} - \beta_{11}}{\beta_{10}} \times 100\%$$

Confounder significant if  $\Delta > 10\%$

### Cardiovascular Mortality

|            | HbA1c2       |                 | HbA1c3   |                | HbA1c4   |                |
|------------|--------------|-----------------|----------|----------------|----------|----------------|
|            | $\beta_{11}$ | 95% CI          | $B_{21}$ | 95% CI         | $B_{31}$ | 95% CI         |
| Full Model | 0.032        | (-0.073, 0.137) | 0.150    | (0.021, 0.279) | 0.163    | (0.013, 0.314) |

| Variable Removed                        | HbA1c2       |          | HbA1c3       |         | HbA1c4       |         |
|-----------------------------------------|--------------|----------|--------------|---------|--------------|---------|
|                                         | $\beta_{10}$ | %change  | $\beta_{20}$ | %change | $\beta_{30}$ | %change |
| Year of ESRD incidence                  | 0.031        | -1.842   | 0.149        | -1.101  | 0.162        | -1.02   |
| Census division                         | 0.028        | -13.551  | 0.146        | -2.752  | 0.156        | -4.492  |
| Age                                     | 0.021        | -54.961  | 0.122        | -23.483 | 0.102        | -60.172 |
| Sex                                     | 0.027        | -16.628  | 0.144        | -4.354  | 0.154        | -5.869  |
| Race                                    | 0.03         | -7.79    | 0.145        | -3.916  | 0.155        | -5.127  |
| Ethnicity                               | 0.027        | -17.778  | 0.144        | -4.73   | 0.154        | -5.848  |
| Medicare/Medicaid dual eligibility      | 0.032        | 0.815    | 0.15         | -0.014  | 0.164        | 0.27    |
| Median rent                             | 0.033        | 2.035    | 0.151        | 0.131   | 0.163        | -0.243  |
| Median household income                 | 0.032        | -0.978   | 0.15         | -0.197  | 0.164        | 0.266   |
| % living below poverty                  | 0.032        | -0.682   | 0.15         | 0.033   | 0.164        | 0.072   |
| % unemployed                            | 0.032        | -0.816   | 0.15         | -0.23   | 0.163        | -0.231  |
| % with less than high school education_ | 0.031        | -1.725   | 0.15         | -0.448  | 0.162        | -0.691  |
| BMI                                     | 0.032        | 1.325    | 0.15         | -0.185  | 0.165        | 0.82    |
| eGFR                                    | 0.038        | 15.758   | 0.158        | 4.823   | 0.174        | 6.296   |
| Heart failure                           | 0.032        | 0.815    | 0.15         | -0.014  | 0.164        | 0.27    |
| Arrhythmias                             | 0.029        | -12.112  | 0.146        | -2.694  | 0.158        | -3.52   |
| Coronary artery disease                 | 0.038        | 16.003   | 0.157        | 4.389   | 0.174        | 5.81    |
| Other cardiac disease                   | 0.03         | -6.873   | 0.147        | -2.59   | 0.159        | -2.797  |
| Peripheral arterial disease             | 0.036        | 10.201   | 0.153        | 1.616   | 0.168        | 2.499   |
| Hypertension                            | 0.032        | -0.037   | 0.15         | -0.048  | 0.163        | -0.017  |
| Chronic obstructive pulmonary disease   | 0.03         | -5.264   | 0.145        | -3.363  | 0.157        | -4.408  |
| Current tobacco use                     | 0.032        | 0.106    | 0.15         | 0.014   | 0.163        | -0.085  |
| Cancer                                  | 0.032        | 0.845    | 0.151        | 0.263   | 0.164        | 0.15    |
| Alcohol dependence                      | 0.032        | -0.663   | 0.15         | -0.101  | 0.163        | -0.254  |
| Albumin                                 | 0.011        | -190.307 | 0.143        | -5.264  | 0.192        | 14.821  |
| nPCR                                    | 0.017        | -84.096  | 0.131        | -14.341 | 0.144        | -13.445 |
| Hemoglobin                              | 0.008        | -319.358 | 0.115        | -30.632 | 0.114        | -43.474 |
| Platelet count                          | 0.025        | -27.151  | 0.144        | -4.699  | 0.157        | -3.972  |
| White blood cell count                  | 0.036        | 11.125   | 0.16         | 5.9     | 0.171        | 4.144   |
| Ferritin                                | 0.033        | 3.243    | 0.152        | 0.827   | 0.167        | 2.002   |
| Mean arterial pressure                  | 0.022        | -47.121  | 0.134        | -11.791 | 0.131        | -24.763 |
| Pulse pressure                          | 0.031        | -3.254   | 0.143        | -5.306  | 0.151        | -7.97   |
| Calcium                                 | 0.031        | -3.327   | 0.148        | -1.883  | 0.16         | -2.412  |
| Phosphorus                              | 0.03         | -7.692   | 0.148        | -1.559  | 0.166        | 1.477   |
| PTH                                     | 0.035        | 7.529    | 0.152        | 0.942   | 0.167        | 1.855   |
| Predialysis weight                      | 0.02         | -61.568  | 0.132        | -13.951 | 0.146        | -11.632 |

**Nonfatal MI**

|            | <b>HbA1c2</b> |                 | <b>HbA1c3</b> |                | <b>HbA1c4</b> |                 |
|------------|---------------|-----------------|---------------|----------------|---------------|-----------------|
|            | $\beta_{11}$  | <b>95% CI</b>   | $B_{21}$      | <b>95% CI</b>  | $B_{31}$      | <b>95% CI</b>   |
| Full Model | 0.096         | (-0.008, 0.200) | 0.147         | (0.009, 0.285) | 0.137         | (-0.003, 0.276) |

| <b>Variable Removed</b>                 | <b>HbA1c2</b> |                | <b>HbA1c3</b> |                | <b>HbA1c4</b> |                |
|-----------------------------------------|---------------|----------------|---------------|----------------|---------------|----------------|
|                                         | $\beta_{10}$  | <b>%change</b> | $B_{20}$      | <b>%change</b> | $B_{30}$      | <b>%change</b> |
| Year of ESRD incidence                  | 0.096         | 0.024          | 0.148         | 0.462          | 0.137         | 0.516          |
| Census division                         | 0.098         | 2.278          | 0.15          | 2.38           | 0.141         | 3.094          |
| Age                                     | 0.079         | -21.178        | 0.105         | -39.755        | 0.053         | -157.567       |
| Sex                                     | 0.095         | -1.538         | 0.145         | -1.634         | 0.133         | -2.5           |
| Race                                    | 0.095         | -1.218         | 0.143         | -3.06          | 0.13          | -4.908         |
| Ethnicity                               | 0.092         | -4.224         | 0.141         | -4.376         | 0.13          | -5.379         |
| Medicare/Medicaid dual eligibility      | 0.095         | -0.773         | 0.146         | -0.528         | 0.135         | -1.327         |
| Median rent                             | 0.096         | -0.069         | 0.147         | -0.005         | 0.137         | 0.091          |
| Median household income                 | 0.096         | -0.136         | 0.147         | -0.083         | 0.137         | 0.142          |
| % living below poverty                  | 0.096         | 0.038          | 0.147         | 0.018          | 0.137         | -0.031         |
| % unemployed                            | 0.096         | 0.158          | 0.147         | 0.133          | 0.137         | 0.248          |
| % with less than high school education_ | 0.097         | 0.886          | 0.148         | 0.877          | 0.138         | 1.149          |
| BMI                                     | 0.096         | 0.04           | 0.147         | 0.018          | 0.137         | 0.17           |
| eGFR                                    | 0.098         | 2.344          | 0.149         | 1.736          | 0.138         | 1.363          |
| Heart failure                           | 0.096         | 0.037          | 0.148         | 0.958          | 0.141         | 3.021          |
| Arrhythmias                             | 0.096         | -0.309         | 0.146         | -0.294         | 0.136         | -0.517         |
| Coronary artery disease                 | 0.11          | 12.547         | 0.165         | 11.098         | 0.159         | 14.346         |
| Other cardiac disease                   | 0.092         | -4.168         | 0.141         | -4.262         | 0.129         | -5.729         |
| Peripheral arterial disease             | 0.099         | 2.801          | 0.149         | 1.73           | 0.142         | 3.472          |
| Hypertension                            | 0.096         | 0.084          | 0.147         | 0.274          | 0.137         | -0.033         |
| Chronic obstructive pulmonary disease   | 0.096         | -0.305         | 0.146         | -0.581         | 0.135         | -0.887         |
| Current tobacco use                     | 0.096         | -0.117         | 0.147         | 0.035          | 0.136         | -0.409         |
| Cancer                                  | 0.094         | -1.839         | 0.144         | -1.651         | 0.134         | -1.645         |
| Alcohol dependence                      | 0.097         | 1.047          | 0.148         | 0.672          | 0.139         | 1.671          |
| Albumin                                 | 0.097         | 1.288          | 0.154         | 4.802          | 0.159         | 13.825         |
| nPCR                                    | 0.091         | -5.847         | 0.14          | -5.004         | 0.129         | -6.238         |
| Hemoglobin                              | 0.083         | -16.094        | 0.126         | -16.334        | 0.11          | -24.235        |
| Platelet count                          | 0.095         | -1.317         | 0.145         | -1.156         | 0.134         | -1.762         |
| White blood cell count                  | 0.098         | 1.757          | 0.149         | 1.716          | 0.14          | 2.293          |
| Ferritin                                | 0.097         | 0.949          | 0.148         | 1.01           | 0.139         | 1.47           |
| Mean arterial pressure                  | 0.098         | 2.14           | 0.15          | 2.189          | 0.143         | 4.632          |
| Pulse pressure                          | 0.096         | 0.148          | 0.148         | 0.68           | 0.139         | 1.617          |
| Calcium                                 | 0.094         | -1.909         | 0.143         | -2.442         | 0.133         | -2.889         |
| Phosphorus                              | 0.093         | -3.532         | 0.144         | -2.114         | 0.139         | 1.871          |
| PTH                                     | 0.098         | 1.775          | 0.147         | 0.116          | 0.138         | 0.928          |
| Predialysis weight                      | 0.083         | -15.919        | 0.127         | -15.368        | 0.117         | -16.526        |

**Fatal or Nonfatal MI**

|            | <b>HbA1c2</b> |                 | <b>HbA1c3</b> |                 | <b>HbA1c4</b> |                |
|------------|---------------|-----------------|---------------|-----------------|---------------|----------------|
|            | $\beta_{11}$  | <b>95% CI</b>   | $B_{21}$      | <b>95% CI</b>   | $B_{31}$      | <b>95% CI</b>  |
| Full Model | 0.074         | (-0.023, 0.170) | 0.120         | (-0.016, 0.256) | 0.181         | (0.016, 0.345) |

| <b>Variable Removed</b>                 | <b>HbA1c2</b> |                | <b>HbA1c3</b> |                | <b>HbA1c4</b> |                |
|-----------------------------------------|---------------|----------------|---------------|----------------|---------------|----------------|
|                                         | $\beta_{10}$  | <b>%change</b> | $B_{20}$      | <b>%change</b> | $B_{30}$      | <b>%change</b> |
| Year of ESRD incidence                  | 0.074         | 0.438          | 0.122         | 1.381          | 0.183         | 1.032          |
| Census division                         | 0.076         | 2.263          | 0.123         | 2.556          | 0.185         | 2.148          |
| Age                                     | 0.058         | -27.5          | 0.08          | -50.449        | 0.099         | -82.27         |
| Sex                                     | 0.072         | -2.564         | 0.117         | -2.822         | 0.176         | -2.565         |
| Race                                    | 0.072         | -2.195         | 0.115         | -4.267         | 0.174         | -4.027         |
| Ethnicity                               | 0.071         | -4.385         | 0.115         | -4.163         | 0.175         | -3.055         |
| Medicare/Medicaid dual eligibility      | 0.073         | -0.697         | 0.12          | -0.416         | 0.18          | -0.641         |
| Median rent                             | 0.074         | 0.003          | 0.12          | 0.008          | 0.181         | 0.006          |
| Median household income                 | 0.074         | -0.11          | 0.12          | -0.044         | 0.181         | 0.141          |
| % living below poverty                  | 0.074         | -0.056         | 0.12          | -0.039         | 0.181         | 0.025          |
| % unemployed                            | 0.074         | 0.277          | 0.12          | 0.234          | 0.181         | 0.27           |
| % with less than high school education_ | 0.074         | 0.441          | 0.12          | 0.374          | 0.181         | 0.351          |
| BMI                                     | 0.074         | 0.205          | 0.12          | 0.088          | 0.181         | 0.388          |
| eGFR                                    | 0.075         | 1.069          | 0.12          | 0.397          | 0.179         | -0.657         |
| Heart failure                           | 0.074         | 0.393          | 0.121         | 0.943          | 0.185         | 2.374          |
| Arrhythmias                             | 0.074         | -0.439         | 0.12          | -0.345         | 0.18          | -0.338         |
| Coronary artery disease                 | 0.087         | 15.233         | 0.137         | 12.671         | 0.201         | 10.191         |
| Other cardiac disease                   | 0.07          | -5.746         | 0.114         | -5.666         | 0.173         | -4.621         |
| Peripheral arterial disease             | 0.077         | 3.58           | 0.123         | 2.071          | 0.185         | 2.472          |
| Hypertension                            | 0.074         | 0.05           | 0.12          | 0.2            | 0.181         | -0.022         |
| Chronic obstructive pulmonary disease   | 0.073         | -0.643         | 0.119         | -1.079         | 0.179         | -1.054         |
| Current tobacco use                     | 0.074         | -0.182         | 0.12          | 0.016          | 0.18          | -0.332         |
| Cancer                                  | 0.072         | -2.802         | 0.117         | -2.405         | 0.178         | -1.365         |
| Alcohol dependence                      | 0.075         | 1.439          | 0.121         | 1.02           | 0.183         | 1.418          |
| Albumin                                 | 0.074         | -0.458         | 0.127         | 5.263          | 0.204         | 11.588         |
| nPCR                                    | 0.069         | -7.457         | 0.113         | -6.315         | 0.173         | -4.524         |
| Hemoglobin                              | 0.059         | -24.304        | 0.098         | -22.912        | 0.152         | -19.147        |
| Platelet count                          | 0.072         | -1.996         | 0.118         | -1.649         | 0.178         | -1.489         |
| White blood cell count                  | 0.076         | 3.113          | 0.124         | 3.105          | 0.185         | 2.257          |
| Ferritin                                | 0.075         | 1.528          | 0.122         | 1.382          | 0.184         | 1.606          |
| Mean arterial pressure                  | 0.076         | 2.303          | 0.123         | 2.096          | 0.185         | 2.581          |
| Pulse pressure                          | 0.074         | -0.031         | 0.12          | -0.148         | 0.18          | -0.286         |
| Calcium                                 | 0.072         | -2.607         | 0.116         | -3.121         | 0.176         | -2.773         |
| Phosphorus                              | 0.07          | -5.357         | 0.117         | -2.778         | 0.182         | 1.001          |
| PTH                                     | 0.075         | 2.097          | 0.12          | 0.127          | 0.182         | 0.564          |
| Predialysis weight                      | 0.061         | -20.08         | 0.101         | -18.607        | 0.162         | -11.554        |

### Stroke

|            | HbA1c2       |                 | HbA1c3   |                 | HbA1c4   |                 |
|------------|--------------|-----------------|----------|-----------------|----------|-----------------|
|            | $\beta_{11}$ | 95% CI          | $B_{21}$ | 95% CI          | $B_{31}$ | 95% CI          |
| Full Model | 0.123        | (-0.041, 0.287) | -0.001   | (-0.206, 0.205) | 0.119    | (-0.084, 0.322) |

| Variable Removed                       | HbA1c2       |         | HbA1c3   |          | HbA1c4   |          |
|----------------------------------------|--------------|---------|----------|----------|----------|----------|
|                                        | $\beta_{10}$ | %change | $B_{20}$ | %change  | $B_{30}$ | %change  |
| Year of ESRD incidence                 | 0.123        | -0.368  | -0.003   | 82.597   | 0.117    | -1.888   |
| Census division                        | 0.122        | -0.747  | -0.001   | -0.19    | 0.12     | 0.552    |
| Age                                    | 0.105        | -17.422 | -0.044   | 98.794   | 0.036    | -233.695 |
| Sex                                    | 0.125        | 1.861   | 0.003    | 118.436  | 0.124    | 4.049    |
| Race                                   | 0.12         | -2.575  | -0.005   | 88.339   | 0.115    | -3.907   |
| Ethnicity                              | 0.125        | 1.232   | 0.002    | 129.949  | 0.121    | 1.922    |
| Medicare/Medicaid dual eligibility     | 0.124        | 0.368   | 0        | -120.921 | 0.12     | 0.713    |
| Median rent                            | 0.123        | 0.07    | 0        | -28.467  | 0.119    | 0.225    |
| Median household income                | 0.123        | 0.085   | 0        | -8.866   | 0.119    | -0.325   |
| % living below poverty                 | 0.123        | 0.111   | -0.001   | -1.734   | 0.118    | -0.699   |
| % unemployed                           | 0.123        | 0.204   | 0        | -78.983  | 0.12     | 0.444    |
| % with less than high school education | 0.123        | -0.133  | -0.001   | 28.358   | 0.119    | -0.234   |
| BMI                                    | 0.124        | 1.115   | 0.001    | 142.512  | 0.122    | 2.21     |
| eGFR                                   | 0.122        | -1.06   | -0.002   | 76.883   | 0.117    | -2.097   |
| Heart failure                          | 0.123        | 0.169   | 0        | 336.771  | 0.12     | 1.131    |
| Arrhythmias                            | 0.122        | -0.616  | -0.002   | 65.49    | 0.118    | -1.069   |
| Coronary artery disease                | 0.125        | 1.348   | 0.002    | 122.018  | 0.122    | 2.406    |
| Other cardiac disease                  | 0.113        | -8.813  | -0.019   | 97.275   | 0.096    | -23.656  |
| Peripheral arterial disease            | 0.124        | 0.469   | 0        | -1747.9  | 0.12     | 1.133    |
| Hypertension                           | 0.123        | 0.037   | 0        | -1253.15 | 0.119    | -0.003   |
| Chronic obstructive pulmonary disease  | 0.123        | 0.123   | 0        | -633.221 | 0.12     | 0.602    |
| Current tobacco use                    | 0.123        | 0.011   | 0        | -25.118  | 0.119    | 0.183    |
| Cancer                                 | 0.124        | 0.701   | 0.001    | 164.785  | 0.12     | 1.014    |
| Alcohol dependence                     | 0.121        | -2.004  | -0.003   | 82.388   | 0.114    | -4.177   |
| Albumin                                | 0.123        | -0.414  | 0.012    | 104.297  | 0.163    | 27.022   |
| nPCR                                   | 0.113        | -8.533  | -0.014   | 96.104   | 0.104    | -14.044  |
| Hemoglobin                             | 0.112        | -9.694  | -0.017   | 96.874   | 0.097    | -22.219  |
| Platelet count                         | 0.123        | -0.405  | -0.001   | 56.507   | 0.119    | -0.341   |
| White blood cell count                 | 0.128        | 3.502   | 0.005    | 109.877  | 0.125    | 4.514    |
| Ferritin                               | 0.123        | 0.012   | -0.001   | 34.491   | 0.119    | -0.229   |
| Mean arterial pressure                 | 0.13         | 5.336   | 0.011    | 104.789  | 0.144    | 17.209   |
| Pulse pressure                         | 0.123        | -0.128  | -0.002   | 65.194   | 0.118    | -1.136   |
| Calcium                                | 0.122        | -0.761  | -0.002   | 76.993   | 0.117    | -1.96    |
| Phosphorus                             | 0.122        | -0.951  | -0.001   | 57.76    | 0.119    | 0.071    |
| PTH                                    | 0.126        | 2.123   | 0.002    | 131.132  | 0.123    | 2.991    |
| Predialysis weight                     | 0.111        | -11.275 | -0.018   | 97.066   | 0.101    | -18.288  |

**PAD**

|            | <b>HbA1c2</b> |                 | <b>HbA1c3</b> |                 | <b>HbA1c4</b> |                 |
|------------|---------------|-----------------|---------------|-----------------|---------------|-----------------|
|            | $\beta_{11}$  | <b>95% CI</b>   | $B_{21}$      | <b>95% CI</b>   | $\beta_{11}$  | <b>95% CI</b>   |
| Full Model | 0.017         | (-0.298, 0.331) | 0.189         | (-0.197, 0.576) | 0.007         | (-0.481, 0.496) |

| <b>Variable Removed</b>                 | <b>HbA1c2</b> |                | <b>HbA1c3</b> |                | <b>HbA1c4</b> |                 |
|-----------------------------------------|---------------|----------------|---------------|----------------|---------------|-----------------|
|                                         | $\beta_{10}$  | <b>%change</b> | $B_{20}$      | <b>%change</b> | $B_{30}$      | <b>% change</b> |
| Year of ESRD incidence                  | 0.027         | 38.168         | 0.134         | -40.94         | -0.039        | 118.655         |
| Census division                         | 0.014         | -17.979        | 0.19          | 0.441          | 0.01          | 25.465          |
| Age                                     | 0.018         | 6.956          | 0.193         | 2.025          | 0.015         | 50.65           |
| Sex                                     | 0.013         | -32.341        | 0.182         | -3.835         | -0.002        | 422.089         |
| Race                                    | 0.02          | 15.709         | 0.196         | 3.232          | 0.015         | 51.677          |
| Ethnicity                               | 0.02          | 17.117         | 0.193         | 2.041          | 0.01          | 30.849          |
| Medicare/Medicaid dual eligibility      | 0.017         | 0.215          | 0.189         | -0.032         | 0.007         | -3.885          |
| Median rent                             | 0.017         | 2.796          | 0.189         | 0.084          | 0.007         | 2.933           |
| Median household income                 | 0.017         | 0.286          | 0.189         | 0.046          | 0.008         | 3.911           |
| % living below poverty                  | 0.018         | 7.142          | 0.189         | -0.307         | 0.013         | 42.306          |
| % unemployed                            | 0.018         | 8.549          | 0.193         | 1.945          | 0.014         | 49.265          |
| % with less than high school education_ | 0.001         | -1157.14       | 0.18          | -4.889         | 0.026         | 71.615          |
| BMI                                     | 0.021         | 20.08          | 0.195         | 3.014          | 0.016         | 55.422          |
| eGFR                                    | 0.012         | -38.951        | 0.184         | -2.554         | -0.002        | 412.236         |
| Heart failure                           | 0.019         | 10.016         | 0.189         | 0.138          | 0.006         | -21.39          |
| Arrhythmias                             | 0.006         | -158.344       | 0.192         | 1.421          | 0.006         | -19.43          |
| Coronary artery disease                 | 0.018         | 7.132          | 0.192         | 1.459          | 0.008         | 8.115           |
| Other cardiac disease                   | 0.013         | -24.702        | 0.18          | -5.006         | 0.003         | -116.328        |
| Peripheral arterial disease             | 0.037         | 54.839         | 0.165         | -14.905        | 0.027         | 73.15           |
| Hypertension                            | 0.015         | -9.74          | 0.193         | 1.757          | 0.008         | 9.514           |
| Chronic obstructive pulmonary disease   | 0.019         | 13.363         | 0.192         | 1.454          | 0.008         | 7.232           |
| Current tobacco use                     | 0.016         | -6.233         | 0.189         | 0.12           | -0.006        | 228.63          |
| Cancer                                  | 0.02          | 14.484         | 0.192         | 1.246          | 0.009         | 20.893          |
| Alcohol dependence                      | 0.016         | -3.703         | 0.189         | 0.027          | 0.005         | -45.493         |
| Albumin                                 | -0.004        | 487.396        | 0.196         | 3.256          | 0.073         | 90.078          |
| nPCR                                    | 0.025         | 32.76          | 0.199         | 4.827          | 0.025         | 70.77           |
| Hemoglobin                              | 0.007         | -126.436       | 0.176         | -7.28          | -0.007        | 205.657         |
| Platelet count                          | 0.016         | -4.259         | 0.192         | 1.255          | 0.014         | 49.505          |
| White blood cell count                  | 0.01          | -70.63         | 0.199         | 4.812          | 0.035         | 79.048          |
| Ferritin                                | 0.003         | -497.783       | 0.185         | -2.086         | 0.03          | 75.971          |
| Mean arterial pressure                  | 0.006         | -171.737       | 0.165         | -14.896        | -0.051        | 114.105         |
| Pulse pressure                          | 0.019         | 11.3           | 0.191         | 1.131          | 0.01          | 28.713          |
| Calcium                                 | 0.017         | 1.479          | 0.18          | -5.065         | -0.004        | 297.627         |
| Phosphorus                              | -0.003        | 614.937        | 0.172         | -10.188        | -0.036        | 119.923         |
| PTH                                     | 0.024         | 30.949         | 0.196         | 3.689          | 0.02          | 64.334          |
| Predialysis weight                      | 0.019         | 10.387         | 0.185         | -2.019         | -0.001        | 721.527         |

### All-Cause Mortality

|            | HbA1c2       |                 | HbA1c3   |                 | HbA1c4   |                 |
|------------|--------------|-----------------|----------|-----------------|----------|-----------------|
|            | $\beta_{11}$ | 95% CI          | $B_{21}$ | 95% CI          | $B_{31}$ | 95% CI          |
| Full Model | 0.000        | (-0.059, 0.060) | 0.012    | (-0.075, 0.098) | -0.001   | (-0.099, 0.097) |

| Variable Removed                        | HbA1c2       |          | HbA1c3   |          | HbA1c4   |         |
|-----------------------------------------|--------------|----------|----------|----------|----------|---------|
|                                         | $\beta_{10}$ | %change  | $B_{30}$ | %change  | $B_{30}$ | %change |
| Year of ESRD incidence                  | 0            | -138.372 | 0.011    | -7.983   | -0.002   | 55.209  |
| Census division                         | -0.001       | 139.272  | 0.009    | -27.109  | -0.005   | 82.099  |
| Age                                     | -0.017       | 102.426  | -0.032   | 136.706  | -0.091   | 98.973  |
| Sex                                     | -0.003       | 114.58   | 0.007    | -56.043  | -0.008   | 87.642  |
| Race                                    | -0.002       | 117.469  | 0.005    | -113.293 | -0.009   | 89.915  |
| Ethnicity                               | -0.005       | 108.357  | 0.004    | -163.369 | -0.01    | 91.025  |
| Medicare/Medicaid dual eligibility      | 0.001        | 22.348   | 0.012    | 0.077    | -0.001   | -31.78  |
| Median rent                             | 0.001        | 24.214   | 0.012    | 0.776    | -0.001   | 34.203  |
| Median household income                 | 0            | -34.868  | 0.012    | -0.51    | -0.001   | -12.545 |
| % living below poverty                  | 0            | -6.771   | 0.012    | -0.052   | -0.001   | -6.143  |
| % unemployed                            | 0.001        | 31.553   | 0.012    | 1.382    | -0.001   | -50.242 |
| % with less than high school education_ | 0            | 671.787  | 0.011    | -5.909   | -0.002   | 52.203  |
| BMI                                     | 0            | -44.876  | 0.01     | -14.34   | -0.001   | 27.393  |
| eGFR                                    | 0.004        | 88.88    | 0.016    | 27.175   | 0.006    | 116.061 |
| Heart failure                           | 0.001        | 68.726   | 0.014    | 16.735   | 0.003    | 130.61  |
| Arrhythmias                             | -0.002       | 127.116  | 0.01     | -15.728  | -0.004   | 75.891  |
| Coronary artery disease                 | 0.003        | 88.212   | 0.015    | 21.769   | 0.004    | 124.88  |
| Other cardiac disease                   | -0.003       | 113.699  | 0.005    | -132.428 | -0.009   | 89.363  |
| Peripheral arterial disease             | 0.003        | 87.062   | 0.013    | 11.489   | 0.002    | 146.464 |
| Hypertension                            | 0            | -9.333   | 0.011    | -1.767   | -0.001   | 9.153   |
| Chronic obstructive pulmonary disease   | -0.001       | 140      | 0.007    | -59.029  | -0.007   | 85.732  |
| Current tobacco use                     | 0            | -6.771   | 0.012    | 0.326    | -0.001   | 13.691  |
| Cancer                                  | -0.004       | 110.47   | 0.005    | -127.741 | -0.005   | 82.065  |
| Alcohol dependence                      | 0            | 351.534  | 0.011    | -4.566   | -0.002   | 57.436  |
| Albumin                                 | -0.034       | 101.198  | -0.005   | 325.271  | 0.029    | 103.196 |
| nPCR                                    | -0.012       | 103.368  | -0.005   | 331.687  | -0.017   | 94.647  |
| Hemoglobin                              | -0.025       | 101.617  | -0.026   | 143.946  | -0.055   | 98.305  |
| Platelet count                          | -0.005       | 107.815  | 0.006    | -97.706  | -0.004   | 78.423  |
| White blood cell count                  | 0.009        | 95.664   | 0.03     | 60.611   | 0.014    | 106.565 |
| Ferritin                                | 0.001        | 20.078   | 0.011    | -1.236   | -0.002   | 42.866  |
| Mean arterial pressure                  | -0.007       | 106.189  | 0.001    | -1955.3  | -0.025   | 96.247  |
| Pulse pressure                          | -0.001       | 138.246  | 0.002    | -627.972 | -0.018   | 94.956  |
| Calcium                                 | -0.002       | 119.468  | 0.007    | -65.054  | -0.008   | 88.049  |
| Phosphorus                              | -0.001       | 154.449  | 0.01     | -13.692  | 0.002    | 156.477 |
| PTH                                     | 0.002        | 83.148   | 0.013    | 13.426   | 0.002    | 143.968 |
| Predialysis weight                      | -0.016       | 102.577  | -0.011   | 201.271  | -0.025   | 96.267  |
